# Supplementary material for: Facile alkane functionalization in copper-[2.1.1]-(2,6)-pyridinophane-PhINTs systemsElectronic supplementary information (ESI) available: experimental details. See http://www.rsc.org/suppdata/cc/b3/b309519c/
Source: Royal Society of Chemistry journal article supplement (doi:10.1039/b309519c), 2004-01-01
Supplement: b309519c.doc [file b309519c.doc]

Supplementary Material for Chemical Communications

This journal is © The Royal Society of Chemistry 2003

**Facile alkane functionalization in copper-[2.1.1]-(2,6)-pyridinophane-PhINTs systems**

**Andrei N. Vedernikov* and Kenneth G. Caulton***

## Supplemental information

## Experimental

**General.** All manipulations were carried out under purified argon using standard Schlenk and glove box techniques. Solvents were dried and distilled following standard protocols and stored in gas-tight bulbs under argon. All reagents for which a synthesis is not given are commercially available from Aldrich and were used as received without further purification. All NMR solvents were dried, vacuum-transferred and stored in an argon-filled glove box. [2.1.1]-(2,6)-pyridinophane 1 and 2,6-bis(2-pyridylmethyl)pyridine (tpdm), (tpdm)CuCl 2 were synthesized according to the published procedures.

1H and 13C NMR spectra were recorded on Inova 700 spectrometer (1H 400 MHz; 13C 100.62 MHz). 1H and 13C NMR chemical shifts are reported in ppm and referenced to residual solvent resonance peaks.

ESI-MS analysis was performed on Thermo Finnigan MAT 95XP instrument with dichloromethane as a solvent.

**Computational details.** Theoretical calculations in this work have been performed using density functional theory (DFT) method,3 specifically functional PBE,4 implemented in an original program package “Priroda”.5 In PBE calculations relativistic Stevens-Basch-Krauss (SBK) effective core potentials (ECP) 6 optimized for DFT-calculations have been used. The basis set was 311-split for main group elements with one additional polarization p-function for hydrogen, additional two polarization d-functions for elements of higher periods. Full geometry optimization has been performed without constraints on symmetry. For all species under investigation frequency analysis has been carried out. All minima have been checked for the absence of imaginary frequencies.

[**LCuIII(NTs)]+**. Optimized geometry for singlet state with selected bond distances (Å) and angles (deg.) (hydrogen atoms are omitted for clarity):

Cu-N(1), 2.048; Cu-N(2), 1.952; Cu-N(3), 2.239; Cu-N4, 1.798; N4-S, 1.633; N(1)-Cu-N(2), 91.9; N(1)-Cu-N(3), 96.9; N(2)-Cu-N(3), 89.9; Cu-N4-S, 121.3.

[**LCuII(NTs)]+**. Optimized geometry for triplet state with selected bond distances (Å) and angles (deg.) (hydrogen atoms are omitted for clarity):

Cu-N(1), 2.045; Cu-N(2), 2.051; Cu-N(3), 2.092; Cu-N4, 1.798; N4-S, 1.661; N(1)-Cu-N(2), 90.9; N(1)-Cu-N(3), 101.2; N(2)-Cu-N(3), 92.2; Cu-N4-S, 130.6.

Triplet species is 10 kcal/mol lower in energy (Go298) than the singlet.

**[LCuII(NHTs)]+**. Optimized geometry with selected bond distances (Å) and angles (deg.) (hydrogen atoms but that of NH fragment are omitted for clarity):

Cu-N(1), 1.979; Cu-N(2), 2.058; Cu-N(3), 2.196; Cu-N4, 1.870; N4-S, 1.697; N(1)-Cu-N(2), 91.7; N(1)-Cu-N(3), 98.4; N(2)-Cu-N(3), 90.5; Cu-N4-S, 121.6.

[**LCuIII(NTs)]2+**. Optimized geometry with selected bond distances (Å) and angles (deg.) (hydrogen atoms are omitted for clarity):

Cu-N(1), 2.038; Cu-N(2), 1.970; Cu-N(3), 2.018; Cu-N4, 1.786; N4-S, 1.676; N(1)-Cu-N(2), 93.2; N(1)-Cu-N(3), 108.3; N(2)-Cu-N(3), 94.5; Cu-N4-S, 134.0.

Spin population: Cu, 3%; N4, 76%; O1, 14%; O2, 7%.

**[LCuIII(NHTs)]2+**. Optimized geometry for singlet state with selected bond distances (Å) and angles (deg.) (hydrogen atoms but that of NH fragment are omitted for clarity):

Cu-N(1), 1.934; Cu-N(2), 2.050; Cu-N(3), 2.133; Cu-N4, 1.841; N4-S, 1.736; N(1)-Cu-N(2), 92.6; N(1)-Cu-N(3), 100.1; N(2)-Cu-N(3), 94.4; Cu-N4-S, 123.2.

Triplet species is 1 kcal/mol higher in energy (Go298) than the singlet.

Spin population for triplet species: Cu, 31%; N1, 5%; N2, 12%; N3, 7%; N4, 25%; O1, 5%; O2, 5%.

**LCuCl, C19H17ClN3Cu.** To a dry flask containing a magnetic stirring bar was added, in a glove box, CuCl (99 mg, 1.0 mmol) and 20.0 mL of dry benzene. To the stirred mixture, [2.1.1]-(2,6)-pyridinophane (287 mg, 1.0 mmol) dissolved in 5.0 mL of benzene was added. Stirring was continued at room temperature for 5 h. The orange precipitate formed was filtered off, washed twice with 1.0 mL portions of benzene and dried. Yield 370 mg (95%).

1H NMR (CD2Cl2, 22oC), 3.25 (m, 2H, C2H4), 4.11 (d, *J* = 13.0 Hz, 2H, CH2), 4.38 (m, 2H, C2H4), 4.71 (d, *J* = 13.0 Hz, 2H, CH2), 7.10 (d, *J* = 8.0 Hz, 2H, *meta*-CH), 7.12 (d, *J* = 7.8 Hz, 2H, *meta*-CH), 7.25 (d, *J* = 7.8 Hz, 2H, *meta*-CH), 7.50 (t, *J* = 7.8 Hz, 2H, *para*-CH), 7.60 (t, *J* = 7.8 Hz, 1H, *para*-CH).

13C NMR (CD2Cl2, -45oC), 35.91 (CH2), 46.54 (C2H4), 122.03, 122.26, 123.05 (*meta*-C, py), 137.25, 137.87 (*para*-C, py), 155.02, 155.51, 159.70 (*ortho*-C, py).

**LCu(OTf), C20H17F3N3SO3Cu.** To a dry flask containing a magnetic stirring bar was added, in a glove box, CuOTf·0.5(PhMe) (258 mg, 1.0 mmol) and 20.0 mL of dry benzene. To the stirred mixture, [2.1.1]-(2,6)-pyridinophane (287 mg, 1.0 mmol) dissolved in 5.0 mL of benzene was added. Stirring was continued at room temperature for 5 h. The light yellowish-green precipitate formed was filtered off, washed twice with 1.0 mL portions of benzene and dried. Yield 450 g (90%).

Signals of LCu(OTf) in its 1H NMR spectrum are broad at r.t. and become more narrow at -30oC.

1H NMR (CD2Cl2, -30oC), 3.27 (m, 2H, C2H4), 4.11 (m, 2H, C2H4), 4.12 (d, *J* = 13.0 Hz, 2H, CH2), 4.47 (d, *J* = 13.0 Hz, 2H, CH2), 7.14 (d, *J* = 7.8 Hz, 2H, *meta*-CH), 7.17 (d, *J* = 7.8 Hz, 2H, *meta*-CH), 7.28 (d, *J* = 7.8 Hz, 2H, *meta*-CH), 7.54 (d, *J* = 7.7 Hz, 2H, *para*-CH), 7.62 (d, *J* = 7.8 Hz, 1H, *para*-CH).

13C NMR (CD2Cl2, -30oC), 35.90 (CH2), 46.64 (C2H4), 122.43, 122.61, 123.42 (*meta*-C, py), 128.44 (CF3), 137.68, 138.30 (*para*-C, py), 155.21, 155.64, 159.33 (*ortho*-C, py).

**LCuCl2, C19H17Cl2N3Cu.** To a dry flask containing a magnetic stirring bar was added, in a glove box, CuCl2 (135 mg, 1.0 mmol) and 20.0 mL of dry benzene. To the stirred mixture, [2.1.1]-(2,6)-pyridinophane (287 mg, 1.0 mmol) dissolved in 5.0 mL of benzene was added. Stirring was continued at room temperature for 5 h. The green precipitate formed was filtered off, washed twice with 1.0 mL portions of benzene and dried. Yield 400 mg (95%).

**LCu(OTf)2, C21H17F6N3O6S2Cu.** To a dry flask containing a magnetic stirring bar was added, in a glove box, Cu(OTf)2 (361 mg, 1.0 mmol) and 20.0 mL of dry benzene. To the stirred mixture, [2.1.1]-(2,6)-pyridinophane (287 mg, 1.0 mmol) dissolved in 5.0 mL of benzene was added. Stirring was continued at room temperature for 5 h. The light green precipitate formed was filtered off, washed twice with 1.0 mL portions of benzene and dried. Yield 600 mg (95%).

**“Activation” of pre-catalysts LCuXn with NaBArF4 (ArF = 3,5-bis(trifluoromethyl)phenyl)**. In an argon-filled glove box a 5 ml Schlenk flask equipped with a Teflon valve and a magnetic stirring bar was charged with 10 mol of LCuXn, 20 (n=2) or 10 (n=1) mol of NaBAr4 and 0.6 ml of CD2Cl2. In one minute large chunks of NaBArF4 dissolved, new fine precipitate appeared and the liquid color turned light-yellow (n = 1; n = 2, X = OTf) or bluish-green (n = 2, X = Cl). According to NMR data, in the case of LCuCl all starting complex was consumed suggesting that the yield of LCuBArF4 is almost quantitative. Catalytic activity of this solution remained unchanged after two days at r.t.

LCuBArF4, 1H NMR (CD2Cl2, -45oC), 3.32 (m, 2H, C2H4), 3.91 (m, 2H, C2H4), 4.16 (d, *J* = 13.8 Hz, 2H, CH2), 4.24 (d, *J* = 13.8 Hz, 2H, CH2), 7.17 (d, *J* = 7.8 Hz, 2H, *meta*-CH), 7.22 (d, *J* = 7.8 Hz, 2H, *meta*-CH), 7.32 (d, *J* = 7.8 Hz, 2H, *meta*-CH), 7.52 (br s, 4H, *para*-CH, BArF4), 7.57 (t, *J* = 7.8 Hz, 2H, *para*-CH), 7.66 (t, *J* = 7.8 Hz, 1H, *para*-CH), 7.71 (br s, 8H, *ortho*-CH, BArF4).

13C NMR (CD2Cl2, -45oC), 35.97 (CH2), 46.55 (C2H4), 117.73 (m, *para*-C, BArF4), 123.02, 123.28, 123.97 (*meta*-C, py), 124.66 (quart, 1*J*C‑F = 272.7 Hz, CF3, BArF4), 128.88 (quart, 2*J*C-F = 31.7 Hz, *meta*-C, BArF4), 134.89 (br s, *ortho*-C, BArF4), 138.89, 139.63 (*para*-C, py), 155.12, 155.73, 159.64 (*ortho*-C, py), 161.92 (quart, 1*J*B-C = 50 Hz, B-C, BArF4).

ESI-MS, m/z (intensity): 350.0 (L63Cu, M+, 100%), 352.0 (L65Cu, M+, 47%). The spectrum was taken for 100 time diluted sample of the above-mentioned solution. Flow rate 20 L/min.

In the case of copper(II) complex (n=2), bluish-green (X = Cl) or yellow (X = OTf) solution was obtained. In both cases the catalytic activity was completely lost in 30 min.

**Catalytic alkane dehydrogenation and aziridination with PhINTs**. The flask with dichloromethane solution containing 10 mol of a particular catalyst was charged with 25 vol. % of an alkane (cyclopentane, cyclohexane, cyclohexane-d12, cyclooctane), mixture of cyclopentane with 60 mol of cyclohexene (competition experiment) and 30vol. % CD3CN if necessary, removed from glove box and cooled in an acetone – liquid nitrogen bath. In the case of gaseous substrates (cyclopropane, butane and isobutane), the necessary amount (2.0 mmol) of gas taken at 1 atm and 20oC was condensed. Then the mixture was allowed to warm up to r.t. and 75 mg (200 mol) of PhINTs was added in one portion. Immediate red color appeared. In a few hours, the precipitate of PhINTs dissolved and the content of the flask was transferred to a Teflon-capped NMR tube. The solution color turned green indicating catalyst degradation.

Yield of corresponding olefin(s) and aziridine(s) was determined by NMR integration relative to signals of PhI liberated. Concentration of gaseous substrates in solution was determined by integration of their signals relative those of BAr4. Integral intensity of a signal of cyclo-C6HD11 relative to signals of BArF4 measured before and after addition of PhINTs was the same within 5% integration error.

In all cases aziridine formed was isolated by filtering the resulting solution through a 2 cm layer of alumina put in a micro-column with subsequent washing with dichloromethane. The filtrate was dried under vacuum to remove solvent and PhI. NMR of the residue was taken to assure in the identity and purity of the product.

Spectral patterns of olefins formed (cyclopentene, cyclohexene, *cis*-cyclooctene, *cis*- and *trans*-2-butene, 2-methylpropene) were identical to those of authentic samples. Spectra of aziridines obtained were identical to those reported in literature:

2-methyl-N-tosylaziridine, 7 N-tosyl-6-azabicyclo[3.1.0]hexane, 8 N-tosyl-7-azabicyclo[4.1.0]heptane, N-tosyl-9-azabicyclo[6.1.0]nonane. 9

***cis*-2,3-Dimethyl-N-tosylaziridine**. 10

1H NMR (CDCl3, 22oC), : 1.15 (vd, 3*J*H-H = 5.0 Hz, 6H, Me, azir), 2.41 (s, 3H, Me, Tol), 2.84 (m, 2H, CH, azir), 7.30 (d, 3*J*H-H 8.0 Hz, CH, Tol), 7.78 (d, 3*J*H-H 8.0 Hz, CH, Tol); 13C NMR (CDCl3, 22oC), : 11.85 (Me, azir), 21.80 (Me, Tol), 40.48 (CH, azir), 127.81, 129.85 (*ortho*-, *meta*-C, Tol), 135.85, 144.39 (*ipso*-, *para*-C, Tol).

***trans*-2,3-Dimethyl-N-tosylaziridine**. 10

1H NMR (CDCl3, 22oC), : 1H NMR (CDCl3, 22oC), : 1.40 (d, 3*J*H-H = 5.0 Hz, 6H, Me, azir), 2.40 (s, 3H, Me, Tol), 2.70 (m, 2H, CH, azir), 7.30 (d, 3*J*H-H 8.0 Hz, CH, Tol), 7.78 (d, 3*J*H-H 8.0 Hz, CH, Tol).

**Reaction of LCuBArF4 with PhINTs**.

A solution of 20 mol of LCuBArF4 in 1.0 ml of CD2Cl2 was prepared as described above and removed from a glove box. The solution was cooled to -60oC with an acetone-liquid nitrogen bath and 3.7 mg of PhINTs (10 mol) was added with stirring. In few seconds the mixture turned dark purple. According to NMR data, yield of (LCu)2NTs(BArF4)2 was almost quantitative. If 20 mol of PhINTs were used, the same product was obtained but in lower (60%) yield. Significant increase of concentration of CHDCl2 as a result of H/D exchange was observed (up to 80% on PhINTs; integration with signals of PhI liberated as a reference). The compound is stable at room temperature for at least several days.

1H NMR (CD2Cl2, -45oC), 2.95 (s, 3H, CH3), 3.46 (br m, 4H, C2H4), 3.54 (d, *J* = 14.2 Hz, 4H, CH2), 3.83 (br m, 4H, C2H4), 4.34 (d, *J* = 14.2 Hz, 4H, CH2), 6.79 (d, *J* = 7.8 Hz, 2H, CH, Tol), 7.06 (d, *J* = 7.8 Hz, 2H, CH, Tol), 7.51 (br s, 8H, *para*-CH, BArF4), 7.72 (br s, 16H, *ortho*-CH, BArF4), 8.02 (t, *J* = 7.8 Hz, 4H, *para*-CH), 8.17 (t, *J* = 7.8 Hz, 2H, *para*-CH), 8.25 (d, *J* = 7.8 Hz, 4H, *meta*-CH), 8.63 (d, *J* = 7.8 Hz, 4H, *meta*-CH), 8.81 (d, *J* = 7.8 Hz, 4H, *meta*-CH).

13C NMR (CD2Cl2, -45oC), 19.94 (CH3), 40.38 (CH2), 46.33 (C2H4), 117.73 (m, *para*-C, BArF4), 124.66 (quart, 1*J*C‑F = 272.7 Hz, CF3, BArF4), 127.46, 129.70 (*ortho*-C, *meta*-C, Tol), 128.88 (quart, 2*J*C-F = 31.7 Hz, *meta*-C, BArF4), 134.89 (br s, *ortho*-C, BArF4), 135.49, 136.42 (*meta*-C, py), 138.90 (*para*-C, py), 139.31 (*meta*-C, py), 139.44 (*para*-C, py), 142.84, 147.57 (*ipso*-C, *para*-C, Tol), 151.29, 155.59 (*ortho*-C, py), 161.92 (quart, 1*J*B-C = 50 Hz, B-C, BArF4), 165.22 (*ortho*-C, py).

ESI-MS, m/z (intensity): 350.0 ([L63Cu]+, 100%), 352.0 ([L65Cu]+, 47%), 520.0 ([L63Cu(NHTs)]+, 0.50%), 522.0 ([L65Cu(NHTs)]+, 0.28%), 1732 ( [L263Cu2NTs](BArF4)+ ), 1736 ( [L263Cu65CuNTs](BArF4)+ ), 1738 ( [L265Cu2NTs](BArF4)+ ).

The spectrum was taken for 100 time diluted sample of the above mentioned solution. Flow rate 20 L/min.

**References**

(1) Vedernikov, A.N.; Huffman, J.C.; Caulton, K.G. *Inorg. Chem.* **2002**, *41*, 6867.

(2) Vedernikov, A.N.; Huffman, J.C.; Caulton, K.G. *Inorg. Chem.* **2002**, *41*, 6244.

(3) Parr, R.G.; Yang, W. *Density-functional theory of atoms and molecules*; Oxford University Press: Oxford, 1989.

(4) Perdew, J.P.; Burke, K.; Ernzerhof, M. *Phys. Rev. Lett* **1996**, *77*, 3865.

(5) Ustynyuk, Y. A.; Ustynyuk, L. Y.; Laikov, D.N.; Lunin, V.V. *J. Organomet. Chem.* **2000**, *597*, 182.

(6) Stevens, W.J.; Basch, H.; Krauss, M., *J. Chem. Phys*., 1984, 81, 6026; Stevens, W.J.; Basch, H.; Krauss, M.; Jasien, P., *Can. J. Chem*., 1992, 70, 612; Cundari, T.R.; Stevens, W.J., *J. Chem. Phys*., 1993, 98, 5555.

(7) Nadir, U.K.; Sharma, R.L; Koul, V.K. *J. Chem. Soc., Perkin Trans. 1*, **1991**, 2015.

(8) Hegedus, L.S.; McKearin, J.M. *J. Am. Chem. Soc*., **1982**, *104*, 2444.

(9) Chanda, B.M.; Vyas, R.; Bedekar, A.V. *J.Org. Chem*., 2001, *31*, 30.

(10) Ghirardelli, R.; Lucas, H.J. *J. Am. Chem. Soc*., **1957**, *79*, 734.
